# Supplementary material for: Theoretical investigation of perfect fullerene-like borospherene Ih-B20 protected by alkaline earth metal: multi-layered spherical electride molecules as electric field manipulated second-order nonlinear optical switches
Source: Royal Society of Chemistry journal article supplement (doi:10.1039/d0dt03266b), 2020-01-01
Supplement: d0dt03266b1.pdf [file d0dt03266b1.pdf]

# **The Perfect Fullerene-Like Borospherene $I_h$ -B<sub>20</sub> Protected Theoretically by Alkaline Earth Metal: Multi-Layered Spherical Electride Molecules as Electric Field Manipulated Second-Order Nonlinear Optical Switches**

Weihong Chen,<sup>a</sup> Jing Li,<sup>a</sup> Jiayuan Liu,<sup>b</sup> Weiming Sun,<sup>c</sup> Zhiru Li<sup>\*a</sup> and Ying Li<sup>\*a</sup>

<sup>a</sup> *Laboratory of Theoretical and Computational Chemistry, Institute of Theoretical Chemistry, College of Chemistry, Jilin University, Changchun, 130023, People's Republic of China*

<sup>b</sup> *Institute of Applied Chemistry, Hebei North University, Zhangjiakou, 075000, People's Republic of China*

<sup>c</sup> *Department of Basic Chemistry, The School of Pharmacy, Fujian Medical University, Fuzhou, 350108, People's Republic of China*

Table S1. The symmetry, bond lengths (B-B, B-Mg, in Å) and diameter of the B<sub>20</sub> cage (*d*, in Å) for Mg<sub>12</sub>&B<sub>20</sub> at different calculation levels.

| Level               | Symmetry              | B-B   | B-Mg  | <i>d</i> |
|---------------------|-----------------------|-------|-------|----------|
| PBE0/6-311G(d)      | <i>I</i> <sub>h</sub> | 1.721 | 2.388 | 4.82     |
| PBE0/6-311+G(d)     | <i>I</i> <sub>h</sub> | 1.720 | 2.387 | 4.82     |
| TPSSH/6-<br>311G(d) | <i>I</i> <sub>h</sub> | 1.725 | 2.396 | 4.84     |
| B3LYP/6-<br>311G(d) | <i>I</i> <sub>h</sub> | 1.723 | 2.408 | 4.83     |
